# Supplementary material for: Feasibility of a registry for standardized assessment of long-term and late-onset health events in survivors of childhood and adolescent cancer
Source: PubMed Central journal article supplement (PMC9418307; doi:10.1038/s41598-022-18962-7), 2022-08-26
Supplement: 41598_2022_18962_MOESM1_ESM.pdf [file 41598_2022_18962_MOESM1_ESM.pdf]

**Supplementary material**

**Feasibility of a Registry for Standardized Assessment of Long-Term and Late-Onset Health  
Events in Survivors of Childhood and Adolescent Cancer**

Maria Otth, Daniel Drozdov, Katrin Scheinemann

**Corresponding Author:**

Maria Otth, MD  
Kantonsspital Aarau  
Tellstrasse 25  
Aarau, 5001  
Switzerland  
Phone: 41 62 838 41 41  
Email: maria.otth@ksa.ch

**Supplementary Table 1: Frequency of medical conditions according to modified CTCAE criteria.** Stratified by survivors diagnosed with leukemia/ lymphoma and other diagnoses; being at risk defined by COG survivorship guidelines; more than one condition possible per survivor.

|                                               |            | <b>Grade</b> | <b>Leukemia and Lymphoma</b> | <b>Other diagnosis</b> |
|-----------------------------------------------|------------|--------------|------------------------------|------------------------|
| n                                             |            |              | 25                           | 25                     |
| <b>Hematologic</b>                            |            |              |                              |                        |
| <b>Survivors at risk</b>                      | <b>Yes</b> |              | <b>25</b>                    | <b>23</b>              |
| <b>Hematologic outcomes (CTCAE)</b>           | <b>Yes</b> |              | <b>1 (1 at risk)</b>         | <b>1 (0 at risk)</b>   |
| Anemia                                        |            | 1            | 1                            | 0                      |
| <b>Neurologic</b>                             |            |              |                              |                        |
| <b>Survivors at risk</b>                      | <b>Yes</b> |              | <b>25</b>                    | <b>25</b>              |
| <b>Neurologic outcomes (CTCAE)</b>            | <b>Yes</b> |              | <b>1 (1 at risk)</b>         | <b>10 (10 at risk)</b> |
| Cerebellar dysfunction                        |            | 1            | 0                            | 1                      |
|                                               |            | 2            | 0                            | 2                      |
| Cranial nerve disorder                        |            | 1            | 0                            | 2                      |
|                                               |            | 2            | 0                            | 3                      |
| Dysarthria                                    |            | 2            | 0                            | 1                      |
| Movement disorders                            |            | 1            | 0                            | 1                      |
| Nerve root disorder                           |            | <b>3</b>     | <b>0</b>                     | <b>1</b>               |
| Peripheral motor neuropathy                   |            | 2            | 0                            | 1                      |
| Peripheral sensory neuropathy                 |            | 1            | 0                            | 1                      |
|                                               |            | 2            | 0                            | 1                      |
| Seizures                                      |            | 2            | 1                            | 0                      |
|                                               |            | <b>3</b>     | <b>0</b>                     | <b>1</b>               |
| <b>Renal/ Urinary Tract</b>                   |            |              |                              |                        |
| <b>Survivors at risk</b>                      | <b>Yes</b> |              | <b>21</b>                    | <b>24</b>              |
| <b>Renal/ urinary tract outcomes (CTCAE)</b>  | <b>Yes</b> |              | <b>3 (3 at risk)</b>         | <b>8 (7 at risk)</b>   |
| Chronic kidney disease                        |            | 1            | 3                            | 7                      |
|                                               |            | 2            | 0                            | 1                      |
| <b>Reproductive/ Genital</b>                  |            |              |                              |                        |
| <b>Survivors at risk</b>                      | <b>Yes</b> |              | <b>23</b>                    | <b>23</b>              |
| <b>Reproductive/ genital outcomes (CTCAE)</b> | <b>Yes</b> |              | <b>0</b>                     | <b>8 (8 at risk)</b>   |
| Abnormal sperm concentration                  |            | 2            | 0                            | 1                      |
| Dyspareunia                                   |            | 2            | 0                            | 1                      |
| Central hypogonadism                          |            | 2            | 0                            | 3                      |
| Precocious puberty                            |            | 2            | 0                            | 1                      |
| Primary ovarian failure                       |            | <b>3</b>     | <b>0</b>                     | <b>1</b>               |
| <b>Endocrine</b>                              |            |              |                              |                        |
| <b>Survivors at risk</b>                      | <b>Yes</b> |              | <b>8</b>                     | <b>12</b>              |
| <b>Endocrine CTCAE</b>                        | <b>Yes</b> |              | <b>13</b>                    | <b>16</b>              |
| Abnormal glucose metabolism                   |            | <b>3</b>     | <b>0</b>                     | <b>1</b>               |

|                                 |            |          |           |           |
|---------------------------------|------------|----------|-----------|-----------|
| Adrenal insufficiency           |            | 2        | 0         | 2         |
| Adult growth hormone deficiency |            | 1        | 0         | 4         |
| Diabetes insipidus              |            | 2        | 0         | 3         |
| Hyperthyroidism                 |            | 2        | 1         | 0         |
| Hypothyroidism                  |            | 2        | 3         | 6         |
| Obesity                         |            | 2        | 7         | 9         |
|                                 |            | <b>3</b> | <b>2</b>  | <b>4</b>  |
|                                 |            | <b>4</b> | <b>1</b>  | <b>0</b>  |
| Under weight                    |            | 2        | 1         | 0         |
| <b>Cardiovascular</b>           |            |          |           |           |
| <b>Survivors at risk</b>        | <b>Yes</b> |          | <b>24</b> | <b>17</b> |
| <b>Cardiovascular CTCAE</b>     | <b>Yes</b> |          | <b>14</b> | <b>14</b> |
| Heart valve disorder            |            | 2        | 0         | 2         |
| High total cholesterol          |            | 1        | 2         | 4         |
| Hypertension adult              |            | 1        | 10        | 11        |
|                                 |            | 2        | 2         | 0         |
| Hypertension pediatric          |            | 1        | 1         | 0         |
| Hypertriglyceridemia            |            | 1        | 2         | 3         |
|                                 |            | 2        | 1         | 0         |
|                                 |            | <b>3</b> | <b>0</b>  | <b>1</b>  |
